# Supplementary material for: Investigation on mechanical, corrosion resistance and antibacterial properties of Cu-bearing 2205 duplex stainless steel by solution treatment
Source: Royal Society of Chemistry journal article supplement (doi:10.1039/c6ra22931j), 2016-01-01
Supplement: c6ra22931j1.pdf [file c6ra22931j1.pdf]

1 **Electronic Supplementary Information (ESI)**

2 ※Electronic Supplementary Information (ESI) available: Equivalent electrical circuit  
3 for EIS measurement, tables of antibacterial rates and tensile properties,  
4 electrochemical corrosion parameters determined from the potentiodynamic  
5 polarization and EIS curves, and parameters for decomposition of Cr 2p spectra.

6 **1. Figures**

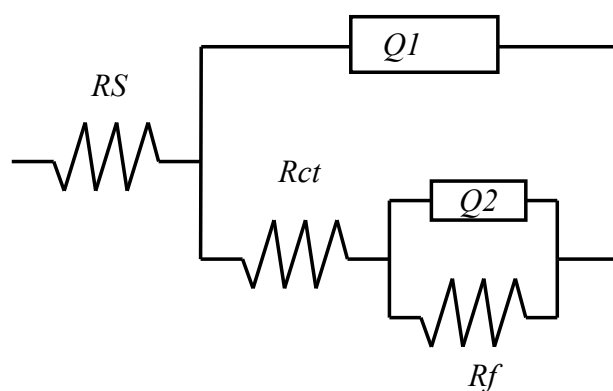

7

8 **SI-Fig. 1** The corresponding equivalent electrical circuit used for fitting the impedance spectra of

9 2205-Cu DSS in the artificial sea water at 25 °C.

11 **2. Tables**

12 **SI-Table 1** Bacterial numbers (CFU per milliliter) of sample surfaces after incubated with *M.*

13 *salsuginis* suspension at 37 °C for 24 h, using the method of standard plate-count.

| Materials     | Heat treatment | Time (h) | Colony numbers<br>(CFU mL <sup>-1</sup> ) | Antibacterial<br>rate, <i>K</i> (%) |
|---------------|----------------|----------|-------------------------------------------|-------------------------------------|
| 2205          | 1050 °C, 1 h   | 24       | 458 ± 35                                  | -                                   |
| 2205-Cu       | 1000 °C, 1 h   | 24       | 182 ± 15                                  | 60.3 % ± 5.8 %                      |
| 2205-Cu       | 1100 °C, 1 h   | 24       | 123 ± 15                                  | 73.1 % ± 5.0 %                      |
| 2205-Cu       | 1150 °C, 1 h   | 24       | 15 ± 2                                    | 91.8 % ± 5.6 %                      |
| Blank control | -              | 24       | 6000 ± 155                                | -                                   |

14 **SI-Table 2** Tensile properties of 2205 and 2205-Cu DSS with different solution treatment

| Materials   | Heat treatments | Tensile<br>strength<br>(MPa) | Yield<br>strength<br>(MPa) | Elongation<br>to fracture<br>(%) | Reduction<br>of fracture<br>(%) |
|-------------|-----------------|------------------------------|----------------------------|----------------------------------|---------------------------------|
| 2205 DSS    | 1050 °C, 1 h    | 802.0 ± 4.5                  | 509.0 ± 4.1                | 48.5 ± 0.5                       | 81.0 ± 0.3                      |
|             | 1000 °C, 1 h    | 855.0 ± 5.2                  | 547.1 ± 4.0                | 42.0 ± 0.6                       | 76.0 ± 0.4                      |
| 2205-Cu DSS | 1100 °C, 1 h    | 869.1 ± 3.9                  | 557.0 ± 4.2                | 37.5 ± 0.5                       | 74.0 ± 0.3                      |
|             | 1150 °C, 1 h    | 872.1 ± 5.1                  | 568.1 ± 4.3                | 37.5 ± 0.5                       | 74.0 ± 0.3                      |

15

16

17 **SI-Table 3** The electrochemical corrosion parameters determined from the potentiodynamic  
 18 polarization curves of 2205 and 2205-Cu DSS samples immersed in the artificial sea water at 25  
 19 °C

|             | Heat treatments | $E_b$ (mV)  | $i_{corr}$ (nA cm <sup>-2</sup> ) |
|-------------|-----------------|-------------|-----------------------------------|
| 2205 DSS    | 1050 °C, 1 h    | 879.6 ± 4.5 | 11.2 ± 1.5                        |
|             | 1000 °C, 1 h    | 804.1 ± 7.5 | 19.6 ± 1.5                        |
| 2205-Cu DSS | 1100 °C, 1 h    | 809.5 ± 5.6 | 20.2 ± 1.8                        |
|             | 1150 °C, 1 h    | 843.1 ± 7.0 | 30.0 ± 1.2                        |

20 **SI-Table 4** The values of corrosion parameters derived from EIS tests of 2205 and 2205-Cu DSS  
 21 samples soaked in the artificial sea water at 25 °C

| Materials   | Heat treatments | $R_s$ (Ω cm <sup>2</sup> ) | $Q_{1CPE} \times 10^{-6}$<br>(Ω <sup>-1</sup> Sn cm <sup>-2</sup> ) | $R_{ct}$<br>(Ω cm <sup>2</sup> ) | $Q_{2CPE} \times 10^{-5}$<br>(Ω <sup>-1</sup> Sn cm <sup>-2</sup> ) | $R_f \times 10^5$<br>(Ω cm <sup>2</sup> ) | $\chi^2$                |
|-------------|-----------------|----------------------------|---------------------------------------------------------------------|----------------------------------|---------------------------------------------------------------------|-------------------------------------------|-------------------------|
| 2205 DSS    | 1000 °C, 1 h    | 9.42 ± 0.75                | 9.19 ± 0.11                                                         | 27.72 ± 1.11                     | 1.32 ± 0.04                                                         | 21.66 ± 0.0009                            | 1.22 × 10 <sup>-4</sup> |
|             | 1000 °C, 1 h    | 7.09 ± 1.31                | 5.42 ± 0.21                                                         | 3.73 ± 1.03                      | 2.32 ± 0.11                                                         | 11.63 ± 0.0015                            | 1.61 × 10 <sup>-4</sup> |
| 2205-Cu DSS | 1100 °C, 1 h    | 5.94 ± 0.81                | 9.82 ± 0.15                                                         | 4.92 ± 1.15                      | 2.67 ± 0.08                                                         | 9.41 ± 0.0011                             | 1.41 × 10 <sup>-4</sup> |
|             | 1150 °C, 1 h    | 7.18 ± 1.13                | 9.82 ± 0.11                                                         | 2.42 ± 1.14                      | 3.18 ± 0.12                                                         | 7.98 ± 0.0012                             | 3.73 × 10 <sup>-5</sup> |

23 **SI-Table 5** Parameters for decomposition of XPS Cr 2p spectra at 15 s of etch time

| Heat treatments | Cr   |                | Cr <sub>2</sub> O <sub>3</sub> |                | Cr(OH) <sub>3</sub> |                |
|-----------------|------|----------------|--------------------------------|----------------|---------------------|----------------|
|                 | Area | Binding energy | Area                           | Binding energy | Area                | Binding energy |
|                 | (%)  | (eV)           | (%)                            | (eV)           | (%)                 | (eV)           |
| 1000 °C, 1 h    | 3.55 | 574.1          | 4.15                           | 576.6          | 3.71                | 577.2          |
| 1100 °C, 1 h    | 4.56 | 574.2          | 8.28                           | 576.6          | 3.86                | 577.2          |
| 1150 °C, 1 h    | 5.29 | 574.1          | 9.32                           | 576.6          | 4.69                | 577.2          |

24

25
